# Supplementary material
Source: publisher site journal article supplement (https://www.dovepress.com/get_supplementary_file.php?f=452295.docx)
Supplement: Supplementary file 1 [file get_supplementary_file.php]

**Supplementary table 1** Distribution of virulence genes of Salmonella enteritidis (Prediction)

| VF class | Virulence factors | Genes | Detection number | Sum | Detection rate |
| --- | --- | --- | --- | --- | --- |
| Adherence | LPS O-antigen (P. aeruginosa)(Pseudomonas) |  | 6 | 9 | 66.67% |
| Autotransporter | EhaB | *ehaB* | 9 | 9 | 100.00% |
| Fimbrial adherence determinants | Agf/Csg | *csgA* | 9 | 9 | 100.00% |
| *csgD* | 9 | 9 | 100.00% |
| *csgE* | 9 | 9 | 100.00% |
| *csgF* | 9 | 9 | 100.00% |
| *csgG* | 9 | 9 | 100.00% |
| *csgB* | 8 | 9 | 88.89% |
| *csgC* | 6 | 9 | 66.67% |
| Bcf | *bcfA* | 9 | 9 | 100.00% |
| *bcfB* | 9 | 9 | 100.00% |
| *bcfC* | 9 | 9 | 100.00% |
| *bcfD* | 9 | 9 | 100.00% |
| *bcfE* | 9 | 9 | 100.00% |
| *bcfF* | 9 | 9 | 100.00% |
| *bcfG* | 9 | 9 | 100.00% |
| Fim | *fimW* | 7 | 9 | 77.78% |
| *fimY* | 5 | 9 | 55.56% |
| *fimA* | 9 | 9 | 100.00% |
| *fimC* | 9 | 9 | 100.00% |
| *fimD* | 9 | 9 | 100.00% |
| *fimF* | 9 | 9 | 100.00% |
| *fimH* | 9 | 9 | 100.00% |
| *fimI* | 9 | 9 | 100.00% |
| *fimZ* | 9 | 9 | 100.00% |
| Lpf | *lpfA* | 9 | 9 | 100.00% |
| *lpfB* | 9 | 9 | 100.00% |
| *lpfC* | 9 | 9 | 100.00% |
| *lpfD* | 9 | 9 | 100.00% |
| *lpfE* | 9 | 9 | 100.00% |
| Pef | *pefA* | 9 | 9 | 100.00% |
| *pefB* | 9 | 9 | 100.00% |
| *pefC* | 9 | 9 | 100.00% |
| *pefD* | 9 | 9 | 100.00% |
| Peg | *pegA* | 9 | 9 | 100.00% |
| *pegB* | 9 | 9 | 100.00% |
| *pegC* | 9 | 9 | 100.00% |
| *pegD* | 9 | 9 | 100.00% |
| Saf | *safB* | 9 | 9 | 100.00% |
| *safD* | 9 | 9 | 100.00% |
| Sef | *sefC* | 9 | 9 | 100.00% |
| Stb | *stbA* | 9 | 9 | 100.00% |
| *stbB* | 9 | 9 | 100.00% |
| *stbC* | 9 | 9 | 100.00% |
| *stbD* | 9 | 9 | 100.00% |
| *stbE* | 9 | 9 | 100.00% |
| Std | *stdA* | 9 | 9 | 100.00% |
| *stdB* | 9 | 9 | 100.00% |
| *stdC* | 9 | 9 | 100.00% |
| Ste | *steA* | 9 | 9 | 100.00% |
| *steB* | 9 | 9 | 100.00% |
| *steC* | 9 | 9 | 100.00% |
| *steD* | 9 | 9 | 100.00% |
| *steE* | 9 | 9 | 100.00% |
| *steF* | 9 | 9 | 100.00% |
| Stf | *stfA* | 9 | 9 | 100.00% |
| *stfC* | 9 | 9 | 100.00% |
| *stfD* | 9 | 9 | 100.00% |
| *stfE* | 9 | 9 | 100.00% |
| *stfF* | 9 | 9 | 100.00% |
| *stfG* | 9 | 9 | 100.00% |
| Sth | *sthA* | 9 | 9 | 100.00% |
| *sthB* | 9 | 9 | 100.00% |
| *sthC* | 9 | 9 | 100.00% |
| *sthD* | 9 | 9 | 100.00% |
| *sthE* | 9 | 9 | 100.00% |
| Sti | *stiA* | 9 | 9 | 100.00% |
| *stiB* | 9 | 9 | 100.00% |
| *stiC* | 9 | 9 | 100.00% |
| *stiH* | 9 | 9 | 100.00% |
| Macrophage inducible genes | Mig-14 | *mig-14* | 9 | 9 | 100.00% |
| Mig-5 | *mig-5* | 9 | 9 | 100.00% |
| Magnesium uptake | Mg2+ transport | *mgtB* | 9 | 9 | 100.00% |
| *mgtC* | 9 | 9 | 100.00% |
| Nonfimbrial adherence determinants | MisL | *misL* | 9 | 9 | 100.00% |
| RatB | *ratB* | 9 | 9 | 100.00% |
| ShdA | *shdA* | 9 | 9 | 100.00% |
| SinH | *sinH* | 9 | 9 | 100.00% |
| Regulation | PhoPQ | *phoP* | 9 | 9 | 100.00% |
| *phoQ* | 9 | 9 | 100.00% |
| Secretion system | TTSS (SPI-1 encode) | *hilA* | 9 | 9 | 100.00% |
| *hilC* | 9 | 9 | 100.00% |
| *hilD* | 9 | 9 | 100.00% |
| *iacP* | 9 | 9 | 100.00% |
| *iagB* | 9 | 9 | 100.00% |
| *invA* | 9 | 9 | 100.00% |
| *invB* | 9 | 9 | 100.00% |
| *invC* | 9 | 9 | 100.00% |
| *invE* | 9 | 9 | 100.00% |
| *invF* | 9 | 9 | 100.00% |
| *invG* | 9 | 9 | 100.00% |
| *invH* | 9 | 9 | 100.00% |
| *invI* | 9 | 9 | 100.00% |
| *invJ* | 9 | 9 | 100.00% |
| *orgB* | 9 | 9 | 100.00% |
| *orgC* | 9 | 9 | 100.00% |
| *prgH* | 9 | 9 | 100.00% |
| *prgI* | 9 | 9 | 100.00% |
| *prgJ* | 9 | 9 | 100.00% |
| *prgK* | 9 | 9 | 100.00% |
| *sicA* | 9 | 9 | 100.00% |
| *sicP* | 9 | 9 | 100.00% |
| *sipD* | 9 | 9 | 100.00% |
| *spaO* | 9 | 9 | 100.00% |
| *spaP* | 9 | 9 | 100.00% |
| *spaQ* | 9 | 9 | 100.00% |
| *spaR* | 9 | 9 | 100.00% |
| *spaS* | 9 | 9 | 100.00% |
| *sprB* | 9 | 9 | 100.00% |
| *orgA* | 8 | 9 | 88.89% |
| TTSS (SPI-2 encode) | *ssaC* | 9 | 9 | 100.00% |
| *ssaD* | 9 | 9 | 100.00% |
| *ssaE* | 9 | 9 | 100.00% |
| *ssaG* | 9 | 9 | 100.00% |
| *ssaH* | 9 | 9 | 100.00% |
| *ssaJ* | 9 | 9 | 100.00% |
| *ssaK* | 9 | 9 | 100.00% |
| *ssaL* | 9 | 9 | 100.00% |
| *ssaN* | 9 | 9 | 100.00% |
| *ssaO* | 9 | 9 | 100.00% |
| *ssaP* | 9 | 9 | 100.00% |
| *ssaQ* | 9 | 9 | 100.00% |
| *ssaR* | 9 | 9 | 100.00% |
| *ssaU* | 9 | 9 | 100.00% |
| *ssaV* | 9 | 9 | 100.00% |
| *sscA* | 9 | 9 | 100.00% |
| *sscB* | 9 | 9 | 100.00% |
| *sseB* | 9 | 9 | 100.00% |
| *sseC* | 9 | 9 | 100.00% |
| *sseD* | 9 | 9 | 100.00% |
| *ssrA* | 9 | 9 | 100.00% |
| *sseE* | 8 | 9 | 88.89% |
| *ssaT* | 7 | 9 | 77.78% |
| *ssrB* | 7 | 9 | 77.78% |
| *ssaI* | 6 | 9 | 66.67% |
| *ssaM* | 6 | 9 | 66.67% |
| TTSS effectors translocated via both systems | *slrP* | 9 | 9 | 100.00% |
| TTSS-1 translocated effectors | *sopE2* | 7 | 9 | 77.78% |
| *avrA* | 9 | 9 | 100.00% |
| *sipA* | 9 | 9 | 100.00% |
| *sipB* | 9 | 9 | 100.00% |
| *sipC* | 9 | 9 | 100.00% |
| *sopA* | 9 | 9 | 100.00% |
| *sopB/sigD* | 9 | 9 | 100.00% |
| *sopD* | 9 | 9 | 100.00% |
| *sptP* | 9 | 9 | 100.00% |
| *sopE* | 2 | 9 | 22.22% |
| TTSS-2 translocated effectors | *pipB2* | 9 | 9 | 100.00% |
| *pipB* | 9 | 9 | 100.00% |
| *sifA* | 9 | 9 | 100.00% |
| *sifB* | 9 | 9 | 100.00% |
| *sseF* | 9 | 9 | 100.00% |
| *sseG* | 9 | 9 | 100.00% |
| *sseI/srfH* | 9 | 9 | 100.00% |
| *sseJ* | 9 | 9 | 100.00% |
| *sseK1* | 9 | 9 | 100.00% |
| *sseK2* | 9 | 9 | 100.00% |
| *sspH2* | 9 | 9 | 100.00% |
| *sseL* | 6 | 9 | 66.67% |
| *spvD* | 1 | 9 | 11.11% |
| ACE T6SS(Escherichia) | *aec30* | 9 | 9 | 100.00% |
| *aec31* | 9 | 9 | 100.00% |
| *aec32* | 7 | 9 | 77.78% |
| Serum resistance | Rck | *rck* | 9 | 9 | 100.00% |
| Stress adaptation | SodCI | *sodCI* | 8 | 9 | 88.89% |
| Toxin | SpvB | *spvB* | 6 | 9 | 66.67% |
| Invasion | Invasin A(Yersinia) |  | 2 | 9 | 22.22% |

**Supplementary table 2** The distribution of virulence island (Prediction)

| Virulence island species | No. isolates (%) |
| --- | --- |
| C63PI | 9(100.00%) |
| CS54_island | 9(100.00%) |
| SPI-1 | 9(100.00%) |
| SPI-2 | 9(100.00%) |
| SPI-3 | 9(100.00%) |
| SPI-4 | 9(100.00%) |
| SPI-5 | 9(100.00%) |
| SPI-9 | 9(100.00%) |
| SPI-10 | 8(88.89%) |
| SPI-13 | 9(100.00%) |
| SPI-14 | 9(100.00%) |
| SGI1 | 1(11.11%) |

**Supplementary table 3** The distribution of plasmids (Prediction)

| Plasmid species | No. isolates (%) |
| --- | --- |
| IncFIB(s)-IncFII(s)-IncX1 | 5(55.56%) |
| IncFIB(s)-IncFII(s) | 3(33.33%) |
| IncFIB(s)-IncFII(s)-IncHI2-IncHI2A | 1(11.11%) |
